# Supplementary material
Source: Springer Nature journal article supplement (https://www.springermedizin.de/resource/supplementary/13054_2013_2880_MOESM6_ESM.pdf/9714094)

| Study or Subgroup           | PN GLN |      |            | Control |      |            | Weight       | Mean Difference            | IV, Random, 95% CI | Year | Mean Difference | IV, Random, 95% CI |
|-----------------------------|--------|------|------------|---------|------|------------|--------------|----------------------------|--------------------|------|-----------------|--------------------|
|                             | Mean   | SD   | Total      | Mean    | SD   | Total      |              |                            |                    |      |                 |                    |
| <b>2.4.1 Patients on PN</b> |        |      |            |         |      |            |              |                            |                    |      |                 |                    |
| Fuentes-Orozco 2004         | 7.2    | 9.2  | 17         | 7.3     | 4.5  | 16         | 7.5%         | -0.10 [-5.00, 4.80]        | 2004               |      |                 |                    |
| Zhang                       | 11.73  | 6.57 | 22         | 13.39   | 5.08 | 22         | 9.3%         | -1.66 [-5.13, 1.81]        | 2007               |      |                 |                    |
| Perez-Barcena 2008          | 22.9   | 20.6 | 15         | 20.5    | 16   | 15         | 2.2%         | 2.40 [-10.80, 15.60]       | 2008               | ←    |                 | →                  |
| Cai                         | 22.1   | 4.9  | 55         | 23.8    | 5.1  | 55         | 11.1%        | -1.70 [-3.57, 0.17]        | 2008               |      |                 |                    |
| Fuentes-Orozco 2008         | 11     | 11.7 | 22         | 11.14   | 7.41 | 22         | 6.6%         | -0.14 [-5.93, 5.65]        | 2008               |      |                 |                    |
| Estivariz                   | 12     | 2    | 32         | 23      | 6    | 31         | 10.7%        | -11.00 [-13.22, -8.78]     | 2008               | ←    |                 |                    |
| Cekman                      | 19.2   | 12   | 15         | 27.4    | 12   | 15         | 4.2%         | -8.20 [-16.79, 0.39]       | 2011               | ←    |                 |                    |
| Ziegler                     | 17.5   | 14.6 | 75         | 13.6    | 10   | 75         | 8.6%         | 3.90 [-0.10, 7.90]         | 2013               |      |                 |                    |
| <b>Subtotal (95% CI)</b>    |        |      | <b>253</b> |         |      | <b>251</b> | <b>60.3%</b> | <b>-2.30 [-6.50, 1.90]</b> |                    |      |                 |                    |

Heterogeneity:  $\tau^2 = 28.82$ ;  $\chi^2 = 66.39$ ,  $df = 7$  ( $P < 0.00001$ );  $I^2 = 89\%$   
 Test for overall effect:  $Z = 1.07$  ( $P = 0.28$ )

#### 2.4.2 Patients on EN

|                          |      |     |           |      |      |           |              |                            |      |   |  |  |
|--------------------------|------|-----|-----------|------|------|-----------|--------------|----------------------------|------|---|--|--|
| Palmese                  | 12   | 4.6 | 42        | 13   | 3.4  | 42        | 11.2%        | -1.00 [-2.73, 0.73]        | 2006 |   |  |  |
| Luo                      | 7.6  | 0.7 | 11        | 6.9  | 0.9  | 9         | 11.9%        | 0.70 [-0.02, 1.42]         | 2008 |   |  |  |
| Ozgultekin               | 11.8 | 5.9 | 20        | 17.3 | 16.4 | 20        | 4.9%         | -5.50 [-13.14, 2.14]       | 2008 | ← |  |  |
| Eroglu                   | 14   | 2   | 20        | 15   | 2    | 20        | 11.6%        | -1.00 [-2.24, 0.24]        | 2009 |   |  |  |
| <b>Subtotal (95% CI)</b> |      |     | <b>93</b> |      |      | <b>91</b> | <b>39.7%</b> | <b>-0.47 [-1.84, 0.90]</b> |      |   |  |  |

Heterogeneity:  $\tau^2 = 1.11$ ;  $\chi^2 = 9.32$ ,  $df = 3$  ( $P = 0.03$ );  $I^2 = 68\%$   
 Test for overall effect:  $Z = 0.67$  ( $P = 0.50$ )

**Total (95% CI)** **346** **342** **100.0%** **-1.91 [-4.10, 0.28]**

Heterogeneity:  $\tau^2 = 10.34$ ;  $\chi^2 = 108.58$ ,  $df = 11$  ( $P < 0.00001$ );  $I^2 = 90\%$   
 Test for overall effect:  $Z = 1.71$  ( $P = 0.09$ )  
 Test for subgroup differences:  $\chi^2 = 0.66$ ,  $df = 1$  ( $P = 0.42$ ),  $I^2 = 0\%$

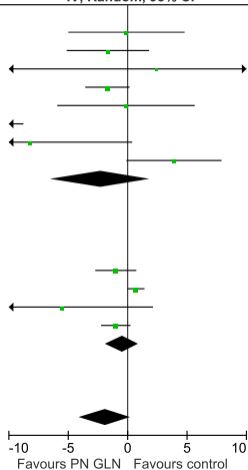

Supplement: MOESM6 [file 9714094]
